# Supplementary material for: Gut Microbiota and Predicted Metabolic Pathways in a Sample of Mexican Women Affected by Obesity and Obesity Plus Metabolic Syndrome
Source: MDPI journal article supplement (doi:10.3390/ijms20020438), 2019-01-21
Supplement: s1 [file s1]

# Gut Microbiota and Predicted Metabolic Pathways in a Sample of Mexican Women Affected by Obesity and Obesity plus Metabolic Syndrome

Alejandra Chávez-Carbajal<sup>1</sup>, Khemlal Nirmalkar<sup>1</sup>, Ana Pérez-Lizaur<sup>2</sup>, Fernando Hernández-Quiroz<sup>1</sup>, Silvia Ramírez-del-Alto<sup>2</sup>, Jaime García-Mena<sup>1\*</sup>, César Hernández-Guerrero<sup>2\*</sup>

<sup>1</sup> Departamento de Genética y Biología Molecular, Cinvestav-IPN, Av IPN 2508, Ciudad de México, 07360, México. Phone: +52 (55) 5747-3800 Ext. 5328; [alejandra.chavez@cinvestav.mx](mailto:alejandra.chavez@cinvestav.mx) (ACC); [nirmalkar@cinvestav.mx](mailto:nirmalkar@cinvestav.mx) (KN); [fernando.hernandez@cinvestav.mx](mailto:fernando.hernandez@cinvestav.mx) (FHQ); [jgmena@cinvestav.mx](mailto:jgmena@cinvestav.mx) (JGM)

<sup>2</sup> Departamento de Salud, Universidad Iberoamericana, Ciudad de México, Paseo de la Reforma 880, Ciudad de México, 01219, México. Phone: +52 (55) 5950-4000 Ext. 9177; [anabertha.perez@ibero.mx](mailto:anabertha.perez@ibero.mx) (APL); [silvia.ramirezalto@gmail.com](mailto:silvia.ramirezalto@gmail.com) (SRA); [cesar.hernandez@ibero.mx](mailto:cesar.hernandez@ibero.mx) (CHG)

\* Correspondence: [cesar.hernandez@ibero.mx](mailto:cesar.hernandez@ibero.mx) (CHG); Tel.: +52 (55) 5950-4000 Ext. 9177; [jgmena@cinvestav.mx](mailto:jgmena@cinvestav.mx) (JGM); Tel.: +52 (55) 5747-3800 Ext. 5328

**Table S1** Relative abundance of bacterial phyla in the study subjects

| Phyla          | Control | Obesity | Obesity +<br>Metabolic<br>Syndrome | p-value | q-value |
|----------------|---------|---------|------------------------------------|---------|---------|
| Firmicutes     | 56.95%  | 72.97%  | 73.34%                             | 0.0029* | 0.0345* |
| Bacteroidetes  | 36.20%  | 22.50%  | 23.43%                             | 0.7125  | 1.0000  |
| Proteobacteria | 4.20%   | 2.80%   | 1.45%                              | 0.1160  | 0.6960  |
| Actinobacteria | 2.32%   | 1.27%   | 1.29%                              | 0.1667  | 0.8002  |
| Tenericutes    | 0.11%   | 0.05%   | 0.04%                              | 0.0893  | 0.6960  |
| Cyanobacteria  | 0.06%   | 0.20%   | 0.07%                              | 0.2861  | 0.9809  |
| Synergistetes  | 0.02%   | 0.00%   | 0.00%                              | 0.2284  | 0.9136  |
| Others         | 0.14%   | 0.22%   | 0.37%                              | <0.0001 | <0.0001 |
| Total          | 100.00% | 100.00% | 100.00%                            | nd      | nd      |

%, means the relative abundance. Kruskal Wallis was used to calculate the p-value, and the False Discovery Rate (FDR-adjusted) q-value. Others includes phyla such as Verrucomicrobia, Spirochaetes, and Fusobacteria. nd, not determined. \*, indicates statistical significance  $p < 0.05$  and  $q < 0.05$  between Control and Obesity + Metabolic Syndrome group. See Figure 1.

**Table S2** Relative abundance of bacterial orders, families and genera in the study subjects

| Taxonomic category      | Control | Obesity | Obesity +<br>Metabolic<br>Syndrome | p-value  | q-value |
|-------------------------|---------|---------|------------------------------------|----------|---------|
| g_Bacteroides           | 20.73%  | 6.47%   | 7.10%                              | <0.0001* | 0.0002* |
| f_Ruminococcaceae       | 16.46%  | 19.16%  | 16.17%                             | 0.5579   | 1.0000  |
| f_Lachnospiraceae       | 10.96%  | 14.75%  | 17.45%                             | <0.0001* | 0.0046* |
| g_Prevotella            | 6.84%   | 11.65%  | 8.85%                              | 0.4073   | 1.0000  |
| g_Blautia               | 5.09%   | 7.33%   | 8.51%                              | 0.1430   | 1.0000  |
| f_Rikenellaceae         | 3.77%   | 2.56%   | 2.14%                              | 0.2519   | 1.0000  |
| o_Clostridiales         | 2.80%   | 3.80%   | 3.86%                              | 0.1650   | 1.0000  |
| g_Ruminococcus          | 2.37%   | 2.09%   | 2.07%                              | 0.8908   | 1.0000  |
| g_Dialister             | 2.20%   | 1.99%   | 2.30%                              | 0.0858   | 1.0000  |
| g_Streptococcus         | 2.19%   | 0.45%   | 0.64%                              | 0.0010   | 0.0793  |
| g_Coprococcus           | 2.18%   | 4.55%   | 4.51%                              | 0.0002*  | 0.0231* |
| f_Erysipelotrichaceae   | 1.74%   | 0.38%   | 0.36%                              | <0.0001* | 0.0075* |
| o_Clostridiales         | 1.48%   | 2.40%   | 2.44%                              | 0.1650   | 1.0000  |
| f_Barnesiellaceae       | 1.45%   | 0.48%   | 0.73%                              | 0.0357   | 1.0000  |
| g_Phascolarctobacterium | 1.45%   | 0.42%   | 0.52%                              | 0.1064   | 1.0000  |
| f_Peptostreptococcaceae | 1.06%   | 2.07%   | 1.82%                              | 0.1306   | 1.0000  |
| g_Parabacteroides       | 1.03%   | 0.44%   | 0.40%                              | 0.0008   | 0.0681  |
| g_Lachnospira           | 0.99%   | 3.24%   | 3.79%                              | <0.0001* | 0.0075* |
| g_Bifidobacterium       | 0.95%   | 0.76%   | 1.39%                              | 0.9837   | 1.0000  |
| g_Eubacterium           | 0.89%   | 0.19%   | 0.20%                              | 0.0267   | 1.0000  |
| g_Collinsella           | 0.89%   | 0.31%   | 0.27%                              | 0.7422   | 1.0000  |
| g_Roseburia             | 0.89%   | 2.72%   | 2.14%                              | 0.0002*  | 0.0231* |
| f_Enterobacteriaceae    | 0.88%   | 0.21%   | 0.48%                              | 0.0704   | 1.0000  |
| f_Clostridiaceae        | 0.78%   | 1.38%   | 1.48%                              | 0.0524   | 1.0000  |
| g_Odoribacter           | 0.57%   | 0.30%   | 0.11%                              | 0.0026   | 0.1729  |
| g_Catenibacterium       | 0.56%   | 0.31%   | 0.15%                              | 0.1058   | 1.0000  |
| g_Faecalibacterium      | 0.55%   | 1.15%   | 1.19%                              | 0.0003*  | 0.0290* |
| Others                  | 8.26%   | 8.47%   | 8.95%                              | 0.3679   | 1.0000  |
| Total                   | 100.00% | 100.00% | 100.00%                            | nd       | nd      |

%, means the relative abundance. Kruskal Wallis was used to calculate the p-value, and the False Discovery Rate (FDR-adjusted) q-value. Others includes all the less abundant orders, families and genera. nd, not determined. \*, indicates statistical significance  $p < 0.05$  and  $q < 0.05$ . See Supplementary Information Figure S1. The statistical significance between pairs of groups is showed in the Supplementary Information Table S7.

**Table S3** Bacterial taxa with different abundance among groups, after Benjamini-Hochberg correction

| Taxonomic Hierarchy                                                                                     | Enriched in Group | log LDA score | <i>p</i> -value | <i>q</i> -value |
|---------------------------------------------------------------------------------------------------------|-------------------|---------------|-----------------|-----------------|
| k_Bacteria_p_Firmicutes_c_Clostridia_o_Clostridiales_f_Lachnospiraceae_g_Roseburia                      | OB                | 3.9411        | 0.0002          | 0.0063          |
| k_Bacteria_p_Proteobacteria_c_Gammaproteobacteria_o_Aeromonadales_f_Succinivibrionaceae_g_Succinivibrio | OB                | 3.7194        | <0.0001         | <0.0001         |
| k_Bacteria_p_Bacteroidetes_c_Bacteroidia_o_Bacteroidales_f_S24_7                                        | OB                | 3.4940        | <0.0001         | <0.0001         |
| k_Bacteria_p_Firmicutes_c_Clostridia_o_Clostridiales_f_Lachnospiraceae                                  | OMS               | 4.6431        | 0.0001          | 0.0048          |
| k_Bacteria_p_Firmicutes_c_Clostridia_o_Clostridiales_f_Lachnospiraceae_g_Lachnospira                    | OMS               | 4.1670        | <0.0001         | 0.0011          |
| k_Bacteria_p_Firmicutes_c_Clostridia_o_Clostridiales_f_Lachnospiraceae_g_Coproccoccus                   | OMS               | 4.0980        | 0.0001          | 0.0032          |
| k_Bacteria_p_Firmicutes_c_Clostridia_o_Clostridiales_f_Ruminococcaceae_g_Faecalibacterium               | OMS               | 3.5611        | 0.0002          | 0.0063          |
| k_Bacteria_p_Firmicutes_c_Clostridia_o_Clostridiales_f_Lachnospiraceae_g_Ruminococcus                   | OMS               | 3.4052        | 0.0001          | 0.0048          |
| k_Bacteria_p_Firmicutes_c_Clostridia_o_Clostridiales_f_Veillonellaceae_g_Megamonas                      | OMS               | 3.0453        | <0.0001         | 0.0001          |
| k_Bacteria_p_Bacteroidetes_c_Bacteroidia_o_Bacteroidales_f_Bacteroidaceae_g_Bacteroides                 | CO                | 4.8619        | <0.0001         | 0.0005          |
| k_Bacteria_p_Firmicutes_c_Bacilli_o_Lactobacillales_f_Streptococcaceae_g_Streptococcus                  | CO                | 3.9944        | 0.0010          | 0.0285          |
| k_Bacteria_p_Firmicutes_c_Erysipelotrichi_o_Erysipelotrichales_f_Erysipelotrichaceae                    | CO                | 3.9013        | <0.0001         | 0.0017          |
| k_Bacteria_p_Bacteroidetes_c_Bacteroidia_o_Bacteroidales_f_Porphyromonadaceae_g_Parabacteroides         | CO                | 3.5003        | 0.0009          | 0.0272          |
| k_Bacteria_p_Firmicutes_c_Bacilli_o_Bacillales_f_Staphylococcaceae_g_Staphylococcus                     | CO                | 3.3018        | <0.0001         | 0.0011          |
| k_Bacteria_p_Firmicutes_c_Bacilli_o_Turicibacterales_f_Turicibacteraceae_g_Turicibacter                 | CO                | 3.1212        | <0.0001         | 0.0006          |
| k_Bacteria_p_Firmicutes_c_Bacilli_o_Lactobacillales_f_Streptococcaceae_g_Lactococcus                    | CO                | 3.0615        | 0.0006          | 0.0199          |

The *p*-value was calculated using Linear Discriminant Analysis Effect Size (LEfSe) analysis, and the *q*-value was calculated using the Benjamini-Hochberg test. OB (Obesity), OMS (obesity + metabolic syndrome), and CO (Control) indicates the phenotypic categories. *p*<0.05 and *q*<0.05 are considered statistically significant. See Figure 4.

**Table S4** Gene content prediction among groups, after FDR correction

| Metabolic Pathway                                      | Control (%)   | Obesity (%)   | Obesity + Metabolic Syndrome (%) | <i>p</i> -value | <i>q</i> -value |
|--------------------------------------------------------|---------------|---------------|----------------------------------|-----------------|-----------------|
| <b><i>Lipid metabolism</i></b>                         |               |               |                                  |                 |                 |
| Lipid metabolism                                       | 0.139 ±0.011  | *0.145 ±0.006 | *0.145 ±0.008                    | 0.0178          | 0.0292          |
| Glycerolipid metabolism                                | 0.400 ±0.042  | 0.428 ±0.027  | *0.433 ±0.021                    | 0.0017          | 0.0044          |
| Synthesis and degradation of ketone bodies             | 0.029 ±0.008  | 0.032 ±0.004  | *0.034 ±0.007                    | 0.0180          | 0.0293          |
| Glycerophospholipid metabolism                         | 0.572 ±0.033  | *0.600 ±0.016 | 0.597 ±0.020                     | 0.0009          | 0.0029          |
| <b><i>Carbohydrate metabolism</i></b>                  |               |               |                                  |                 |                 |
| Glycolysis / Gluconeogenesis                           | *1.141 ±0.046 | 1.121 ±0.018  | 1.115 ±0.019                     | 0.0138          | 0.0241          |
| Pyruvate metabolism                                    | *1.066 ±0.060 | 1.052 ±0.035  | 1.050 ±0.031                     | 0.0098          | 0.0177          |
| Amino sugar and nucleotide sugar metabolism            | *1.527 ±0.105 | 1.441 ±0.046  | 1.440 ±0.062                     | 0.0034          | 0.0073          |
| <b><i>Amino acid metabolism</i></b>                    |               |               |                                  |                 |                 |
| Alanine, aspartate and glutamate metabolism            | *1.099 ±0.071 | 1.066 ±0.023  | 1.059 ±0.028                     | 0.0010          | 0.0030          |
| <b><i>Metabolism of cofactors and vitamins</i></b>     |               |               |                                  |                 |                 |
| Pantothenate and CoA biosynthesis                      | 0.656 ±0.040  | *0.688 ±0.022 | 0.686 ±0.025                     | 0.0019          | 0.0047          |
| Lipid biosynthesis proteins                            | *0.582 ±0.038 | 0.562 ±0.022  | 0.552 ±0.020                     | 0.0064          | 0.0121          |
| <b><i>Glycan biosynthesis and metabolism</i></b>       |               |               |                                  |                 |                 |
| Lipopolysaccharide biosynthesis                        | *0.190 ±0.113 | 0.110 ±0.051  | 0.102 ±0.048                     | 0.0034          | 0.0073          |
| Glycosaminoglycan degradation                          | *0.085 ±0.045 | 0.042 ±0.016  | 0.040 ±0.024                     | 0.0000          | 0.0002          |
| <b><i>Metabolism of other amino acids</i></b>          |               |               |                                  |                 |                 |
| Taurine and hypotaurine metabolism                     | *0.107 ±0.012 | 0.096 ±0.004  | 0.095 ±0.005                     | 0.0003          | 0.0015          |
| <b><i>Endocrine system (Human)</i></b>                 |               |               |                                  |                 |                 |
| Adipocytokine signaling pathway                        | *0.067 ±0.022 | 0.047 ±0.013  | 0.044 ±0.012                     | 0.0005          | 0.0018          |
| <b><i>Endocrine and metabolic diseases (Human)</i></b> |               |               |                                  |                 |                 |
| Type II diabetes mellitus                              | *0.049 ±0.004 | 0.047 ±0.002  | 0.046 ±0.002                     | 0.0017          | 0.0044          |
| Energy metabolism                                      | *0.903 ±0.062 | 0.857 ±0.030  | 0.843 ±0.040                     | 0.0003          | 0.0016          |

The % is reported as the mean of the relative frequencies ± standard deviation. The *p*-value was calculated using Kruskal-Wallis H-Test, and the *q*-value was calculated using the storey FDR test. Obesity, Obesity + Metabolic Syndrome, and Control indicates the phenotypic categories. An asterisk (\*) indicates the highest value among groups. *p*<0.05 and *q*<0.05 are considered statistically significant. The statistical significance between pairs of groups is showed in the Supplementary Information Table S8. See Figure 5.

**Table S5** Determination of the bacterial load and abundance among the studied groups

| Phylum                       | Ct Control   | Ct Obesity   | Ct Obesity + Metabolic Syndrome | <i>p</i> -value |
|------------------------------|--------------|--------------|---------------------------------|-----------------|
| Bacterial Load <sup>\$</sup> | 16.54 ± 3.36 | 17.24 ± 2.22 | 17.09 ± 1.10                    | 0.646           |
| Firmicutes                   | 21.30 ± 2.35 | 20.76 ± 2.83 | 19.52 ± 1.95                    | 0.053*          |
| Bacteroidetes                | 24.90 ± 3.75 | 23.81 ± 4.11 | 24.20 ± 3.23                    | 0.661           |

Ct were determined as described in the Methods section. <sup>\$</sup>, Ct values for bacterial load using the universal primer, data are the average of three independent determinations, ± standard deviation, *p*-values were obtained using ANOVA test. \*A Tukey post hoc test was made after ANOVA to identify significant differences between pair of groups; only a significant *p*-value of 0.046 was found when comparing Control and Obesity + Metabolic Syndrome groups.

**Table S6** Post hoc test to compare among pairs of groups from all clinical characteristics

| Group 1                        | Group 2 | <i>p</i> -value     |
|--------------------------------|---------|---------------------|
| <b>Age (years)</b>             |         |                     |
| CO                             | OMS     | <0.001              |
| CO                             | OB      | <0.001              |
| OMS                            | OB      | 0.779               |
| <b>Height (m)</b>              |         |                     |
| CO                             | OMS     | 0.016               |
| CO                             | OB      | 0.011               |
| OMS                            | OB      | 0.901               |
| <b>Weight (kg)</b>             |         |                     |
| CO                             | OMS     | <0.001              |
| CO                             | OB      | <0.001              |
| OMS                            | OB      | 0.625               |
| <b>BMI (kg/m<sup>2</sup>)</b>  |         |                     |
| CO                             | OMS     | <0.001              |
| CO                             | OB      | <0.001              |
| OMS                            | OB      | 0.770               |
| <b>WC (cm)</b>                 |         |                     |
| CO                             | OMS     | <0.001 <sup>a</sup> |
| CO                             | OB      | <0.001 <sup>a</sup> |
| OMS                            | OB      | 1.000 <sup>a</sup>  |
| <b>HC (cm)</b>                 |         |                     |
| CO                             | OMS     | <0.001 <sup>a</sup> |
| CO                             | OB      | <0.001 <sup>a</sup> |
| OMS                            | OB      | 1.000 <sup>a</sup>  |
| <b>W/H ratio</b>               |         |                     |
| CO                             | OMS     | <0.001 <sup>a</sup> |
| CO                             | OB      | 0.003 <sup>a</sup>  |
| OMS                            | OB      | 1.000 <sup>a</sup>  |
| <b>Fasting Glucose (mg/dl)</b> |         |                     |
| CO                             | OMS     | <0.001              |
| CO                             | OB      | 0.110               |
| OMS                            | OB      | 0.002               |
| <b>Triglycerides (mg/dl)</b>   |         |                     |
| CO                             | OMS     | <0.001              |
| CO                             | OB      | 0.882               |
| OMS                            | OB      | <0.001              |
| <b>HDL (mg/dl)</b>             |         |                     |
| CO                             | OMS     | <0.001              |
| CO                             | OB      | <0.001              |
| OMS                            | OB      | 0.600               |
| <b>LDL (mg/dl)</b>             |         |                     |
| CO                             | OMS     | <0.001 <sup>a</sup> |
| CO                             | OB      | 0.154 <sup>a</sup>  |
| OMS                            | OB      | 0.279 <sup>a</sup>  |
| <b>Cholesterol (mg/dl)</b>     |         |                     |
| CO                             | OMS     | 0.007               |
| CO                             | OB      | 0.972               |
| OMS                            | OB      | 0.009               |
| <b>LDL-c/HDL-c ratio</b>       |         |                     |
| CO                             | OMS     | <0.001 <sup>a</sup> |
| CO                             | OB      | 0.006 <sup>a</sup>  |
| OMS                            | OB      | 0.436 <sup>a</sup>  |
| <b>C/HDL-c ratio</b>           |         |                     |

|                    |     |        |
|--------------------|-----|--------|
| CO                 | OMS | <0.001 |
| CO                 | OB  | 0.005  |
| OMS                | OB  | 0.021  |
| <b>SBP (mm Hg)</b> |     |        |
| CO                 | OMS | <0.001 |
| CO                 | OB  | 0.006  |
| OMS                | OB  | 0.790  |
| <b>DBP (mm Hg)</b> |     |        |
| CO                 | OMS | 0.001  |
| CO                 | OB  | 0.092  |
| OMS                | OB  | 0.363  |

Significances were calculated using Kruskal Wallis test and Bonferroni correction (*p-value*) for non-parametric data and ANOVA with Tukey test for <sup>a</sup>parametric data. *p*<0.05 are considered statistically significant. Control – CO, Obesity – OB, Obesity + Metabolic syndrome – OMS.

**Table S7** Post hoc test to compare between pairs of groups the relative abundance of bacterial orders, families and genera in the study subjects

| Group 1                              | Group 2 | <i>p-value</i> |
|--------------------------------------|---------|----------------|
| <b><i>g_Bacteroides</i>*</b>         |         |                |
| CO                                   | OMS     | <0.001         |
| CO                                   | OB      | 0.001          |
| OMS                                  | OB      | 1.000          |
| <b><i>f_Lachnospiraceae</i>*</b>     |         |                |
| CO                                   | OMS     | <0.001         |
| CO                                   | OB      | 0.016          |
| OMS                                  | OB      | 0.972          |
| <b><i>g_Coprococcus</i>*</b>         |         |                |
| CO                                   | OMS     | 0.001          |
| CO                                   | OB      | 0.001          |
| OMS                                  | OB      | 1.000          |
| <b><i>f_Erysipelotrichaceae</i>*</b> |         |                |
| CO                                   | OMS     | <0.001         |
| CO                                   | OB      | 0.002          |
| OMS                                  | OB      | 1.000          |
| <b><i>g_Lachnospira</i>*</b>         |         |                |
| CO                                   | OMS     | <0.001         |
| CO                                   | OB      | 0.001          |
| OMS                                  | OB      | 1.000          |
| <b><i>g_Roseburia</i>*</b>           |         |                |
| CO                                   | OMS     | <0.001         |
| CO                                   | OB      | 0.006          |
| OMS                                  | OB      | 1.000          |
| <b><i>g_Faecalibacterium</i>*</b>    |         |                |
| CO                                   | OMS     | 0.001          |
| CO                                   | OB      | 0.002          |
| OMS                                  | OB      | 1.000          |

Significances were calculated using Kruskal Wallis test and Bonferroni correction. *p*<0.05 are considered statistically significant. Control – CO, Obesity – OB, Obesity + Metabolic syndrome – OMS.

**Table S8** Post hoc test to compare between pairs of groups the gene content prediction from metabolic pathways of gut microbiota in all study subjects

| Group 1                                                   | Group 2 | <i>p-value</i> |
|-----------------------------------------------------------|---------|----------------|
| <b><i>Glycerolipid metabolism</i></b>                     |         |                |
| CO                                                        | OMS     | 0.001          |
| CO                                                        | OB      | 0.104          |
| OMS                                                       | OB      | 0.873          |
| <b><i>Synthesis and degradation of ketone bodies</i></b>  |         |                |
| CO                                                        | OMS     | 0.017          |
| CO                                                        | OB      | 0.217          |
| OMS                                                       | OB      | 1.000          |
| <b><i>Glycerophospholipid metabolism</i></b>              |         |                |
| CO                                                        | OMS     | 0.005          |
| CO                                                        | OB      | 0.004          |
| OMS                                                       | OB      | 1.000          |
| <b><i>Glycolysis / Gluconeogenesis</i></b>                |         |                |
| CO                                                        | OMS     | 0.013          |
| CO                                                        | OB      | 0.173          |
| OMS                                                       | OB      | 1.000          |
| <b><i>Pyruvate metabolism</i></b>                         |         |                |
| CO                                                        | OMS     | 0.015          |
| CO                                                        | OB      | 0.063          |
| OMS                                                       | OB      | 1.000          |
| <b><i>Amino sugar and nucleotide sugar metabolism</i></b> |         |                |
| CO                                                        | OMS     | 0.005          |
| CO                                                        | OB      | 0.037          |
| OMS                                                       | OB      | 1.000          |
| <b><i>Alanine, aspartate and glutamate metabolism</i></b> |         |                |
| CO                                                        | OMS     | 0.001          |
| CO                                                        | OB      | 0.060          |
| OMS                                                       | OB      | 1.000          |
| <b><i>Pantothenate and CoA biosynthesis</i></b>           |         |                |
| CO                                                        | OMS     | 0.006          |
| CO                                                        | OB      | 0.009          |
| OMS                                                       | OB      | 1.000          |
| <b><i>Lipid biosynthesis proteins</i></b>                 |         |                |
| CO                                                        | OMS     | 0.005          |
| CO                                                        | OB      | 0.264          |
| OMS                                                       | OB      | 0.762          |
| <b><i>Lipopolysaccharide biosynthesis</i></b>             |         |                |
| CO                                                        | OMS     | 0.005          |
| CO                                                        | OB      | 0.035          |
| OMS                                                       | OB      | 1.000          |
| <b><i>Glycosaminoglycan degradation</i></b>               |         |                |
| CO                                                        | OMS     | <0.001         |
| CO                                                        | OB      | 0.004          |
| OMS                                                       | OB      | 0.737          |
| <b><i>Taurine and hypotaurine metabolism</i></b>          |         |                |
| CO                                                        | OMS     | <0.001         |
| CO                                                        | OB      | 0.014          |
| OMS                                                       | OB      | 1.000          |
| <b><i>Adipocytokine signaling pathway</i></b>             |         |                |
| CO                                                        | OMS     | <0.001         |
| CO                                                        | OB      | 0.033          |
| OMS                                                       | OB      | 1.000          |
| <b><i>Type II diabetes mellitus</i></b>                   |         |                |
| CO                                                        | OMS     | 0.001          |
| CO                                                        | OB      | 0.104          |
| OMS                                                       | OB      | 0.873          |
| <b><i>Lipid Metabolism</i></b>                            |         |                |
| CO                                                        | OMS     | <0.001         |
| CO                                                        | OB      | 0.097          |
| OMS                                                       | OB      | 0.445          |
| <b><i>Energy Metabolism</i></b>                           |         |                |
| CO                                                        | OMS     | 0.033          |
| CO                                                        | OB      | 0.070          |
| OMS                                                       | OB      | 1.000          |

Significances were calculated using Kruskal Wallis test and Bonferroni correction.  $p < 0.05$  are considered statistically significant. Control – CO, Obesity – OB, Obesity + Metabolic syndrome – OMS.



**Table S9.** Alpha diversity index between pair of groups.

| Group 1        | Group 2 | Group 1 mean | Group 1 std | Group 2 mean | Group 2 std | <i>p-value</i> |
|----------------|---------|--------------|-------------|--------------|-------------|----------------|
| <b>Chao1</b>   |         |              |             |              |             |                |
| OMS            | CO      | 769.349      | 101.717     | 583.537      | 87.787      | 0.003*         |
| OB             | CO      | 787.136      | 137.770     | 583.537      | 87.787      | 0.002*         |
| OMS            | OB      | 769.349      | 101.717     | 787.136      | 137.770     | 0.653          |
| <b>Shannon</b> |         |              |             |              |             |                |
| OMS            | CO      | 6.562        | 0.379       | 6.324        | 0.459       | 0.090          |
| OB             | CO      | 6.606        | 0.358       | 6.324        | 0.459       | 0.171          |
| OMS            | OB      | 6.562        | 0.379       | 6.606        | 0.358       | 0.691          |
| <b>Simpson</b> |         |              |             |              |             |                |
| OMS            | CO      | 0.973        | 0.010       | 0.967        | 0.017       | 0.519          |
| OB             | CO      | 0.974        | 0.010       | 0.967        | 0.017       | 0.284          |
| OMS            | OB      | 0.973        | 0.010       | 0.974        | 0.010       | 0.841          |

The results appear like mean and  $\pm$  standard deviation - std. *P-value* was calculated to compares alpha diversities based on a two-sample t-test using a non-parametric methods and the default number of Monte Carlo permutations in order to find different significances among groups. Control – CO, Obesity – OB, Obesity + Metabolic syndrome – OMS. \*, means significant differences between pairs of groups.

**Table S10.** Analysis by Beta diversity in all data set and in a paired age sub-sample.

|                                 | Sample size | Groups | Test statistic | <i>p-value</i> |
|---------------------------------|-------------|--------|----------------|----------------|
| Unweighted                      |             |        |                |                |
| All CO, OB and OMS participants | 67          | 3      | 0.20           | 0.01           |
| Sub-sample controlled by age    | 9           | 3      | 0.32           | 0.02           |
| Weighted                        |             |        |                |                |
| All CO, OB and OMS participants | 67          | 3      | 0.08           | 0.01           |

*P-value* was calculated to compares beta diversities using a distance matrix as the primary input and mapping file. ANOSIM method such a non-parametric test and the default number of permutations in order to find different significances among groups. Control – CO, Obesity – OB, Obesity + Metabolic syndrome – OMS.  $p < 0.05$  is considered statistically significant.

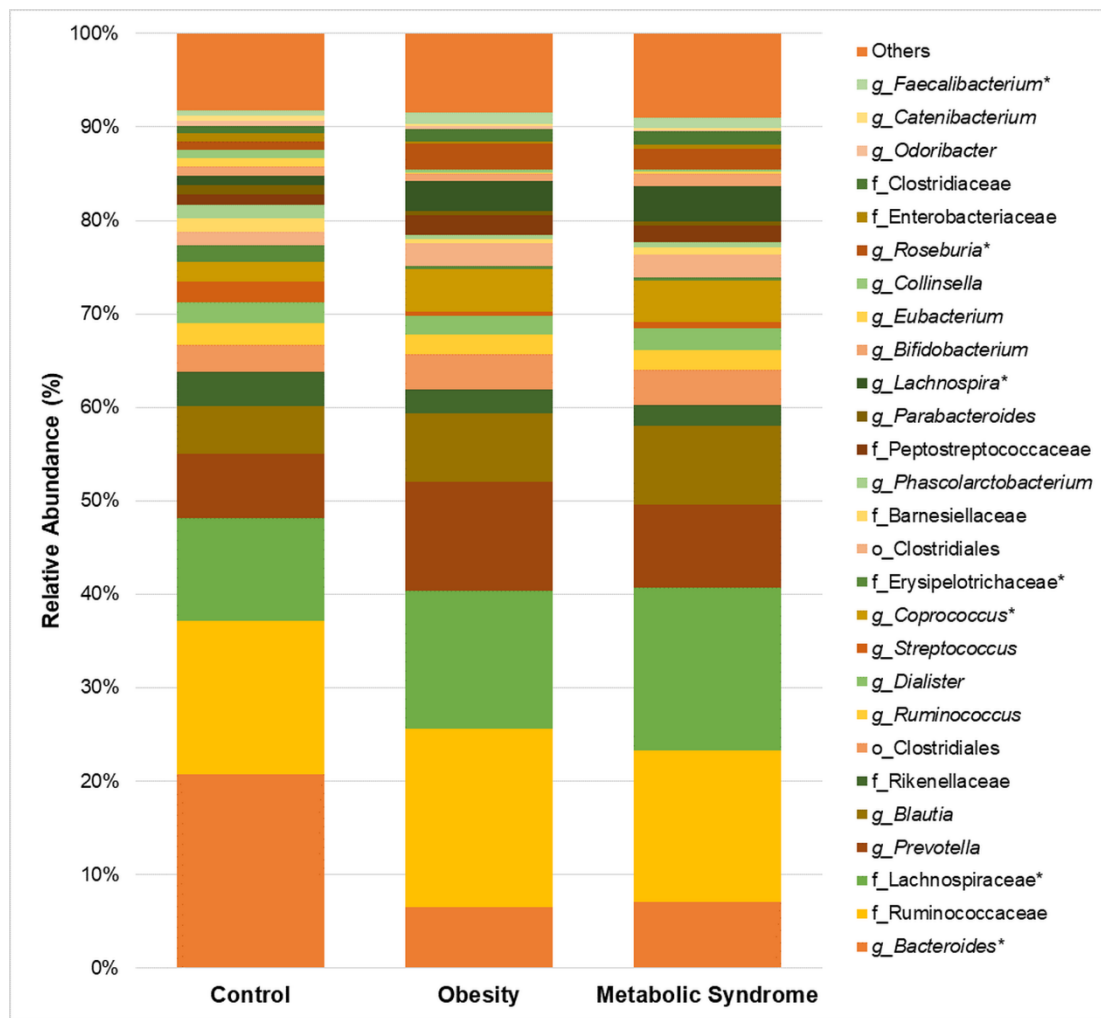

**Figure S1.** Bacterial diversity in Control, Obesity, and Obesity + Metabolic syndrome. The figure shows bar charts of relative abundance for relevant bacterial orders, families and genera, present in the three phenotypic categories. Each taxonomic hierarchy is identified by colors as indicated beside the bars. An asterisk shows bacteria with significant change in the relative abundance (see results).

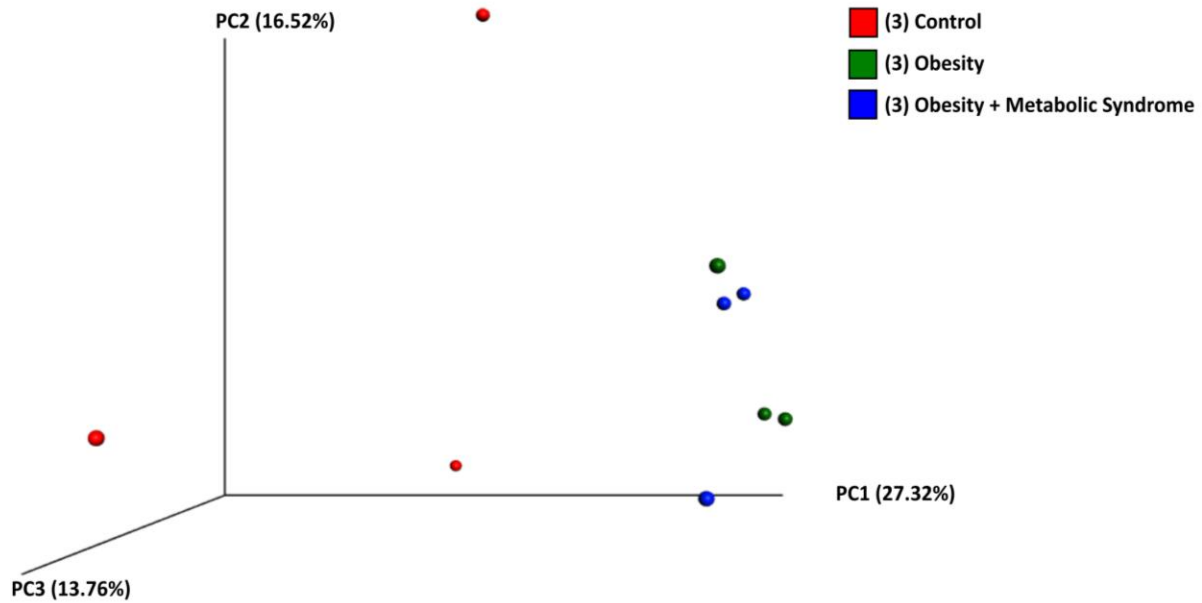

**Figure S2.** Bacterial beta diversity. The Figure shows a three-dimensional scatter plot, generated using principal coordinates analysis (PCoA) from Unweighted UniFrac analyses, showing the distance of microbial communities among women with normal weight (red color spheres), women with obesity (green color spheres), and obesity + metabolic syndrome (blue color spheres). Each group is identified by colors as indicated on the right side of the figure. P-value was calculated using ANOSIM method to compare beta diversities using a distance matrix as the primary input and mapping file. Control, Obesity, and Obesity + Metabolic syndrome have significant differences (*p-value* 0.02). See Table S10.

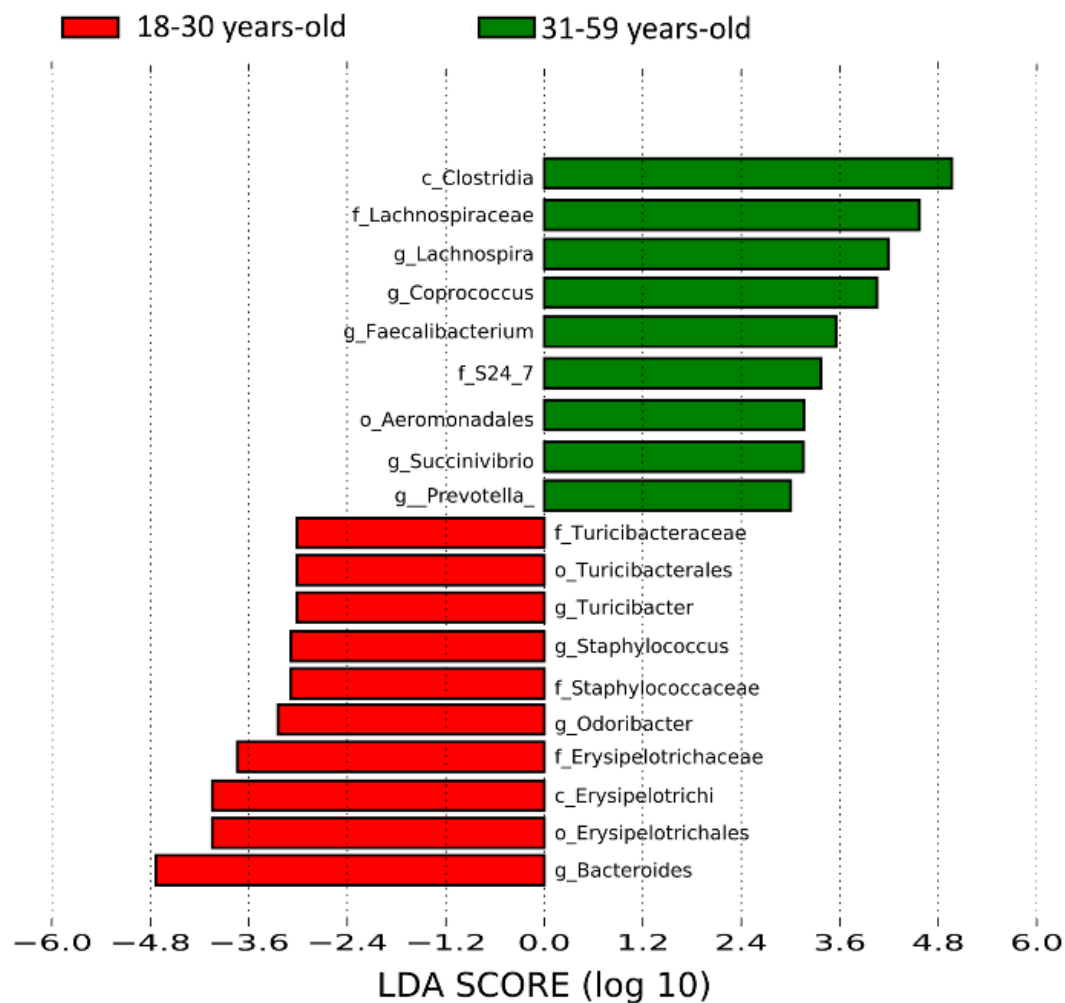

**Figure S3.** Linear discriminant analysis Effect Size (LEfSe) for the bacterial communities. The LEfSe plot shows enriched bacterial families and genera significantly associated with two age group categories. Ten bacteria were enriched in the 18-30 years-old group (red) and nine bacteria in the 31-59 years-old group (green). The LDA score or Effect size is shown at logarithmic scale underneath the bars. Each group is identified by color on top of the figure.

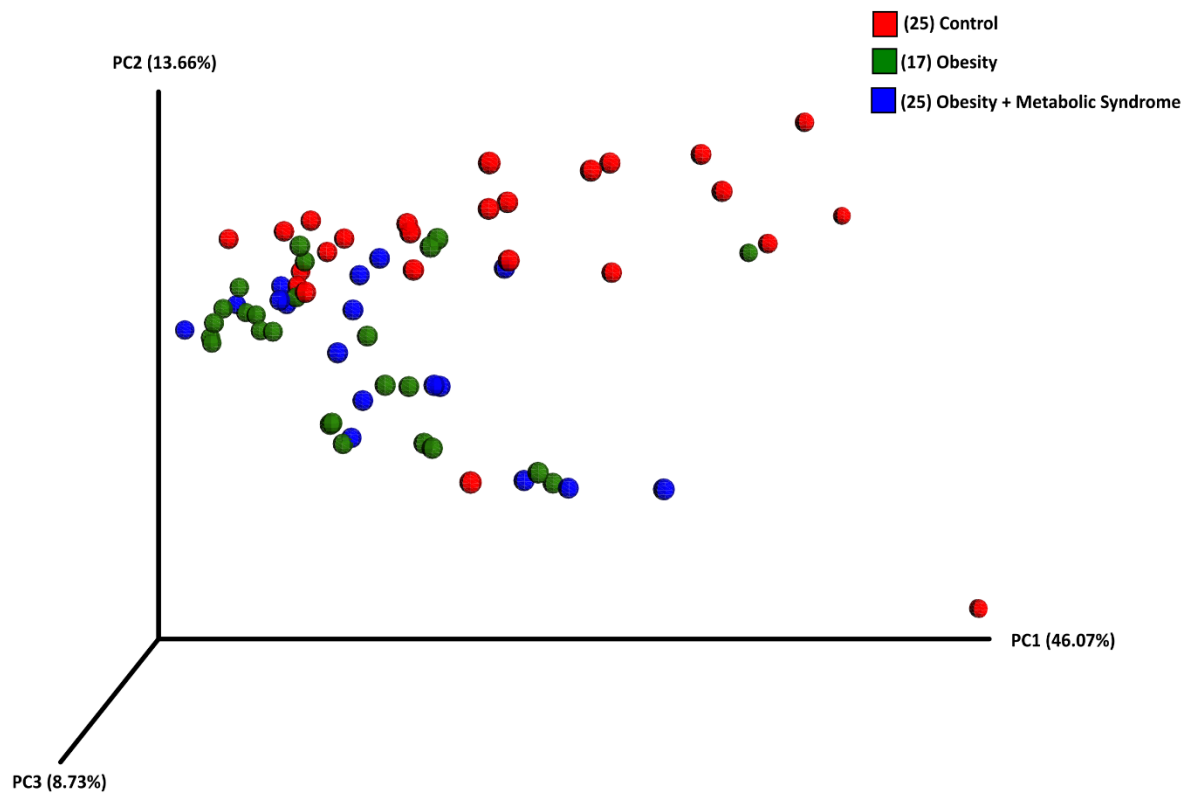

**Figure S4.** Bacterial beta diversity. The Figure shows a three-dimensional scatter plot, generated using principal coordinates analysis (PCoA) from Weighted UniFrac analyses, showing the distance of microbial communities among women with normal weight (red color spheres), women with obesity (green color spheres), and obesity + metabolic syndrome (blue color spheres). Each group is identified by colors as indicated on the right side of the figure.  $p$ -value was calculated using ANOSIM method to compare beta diversities using a distance matrix as the primary input and mapping file. There are not significant differences among groups ( $p$ -value 0.01).

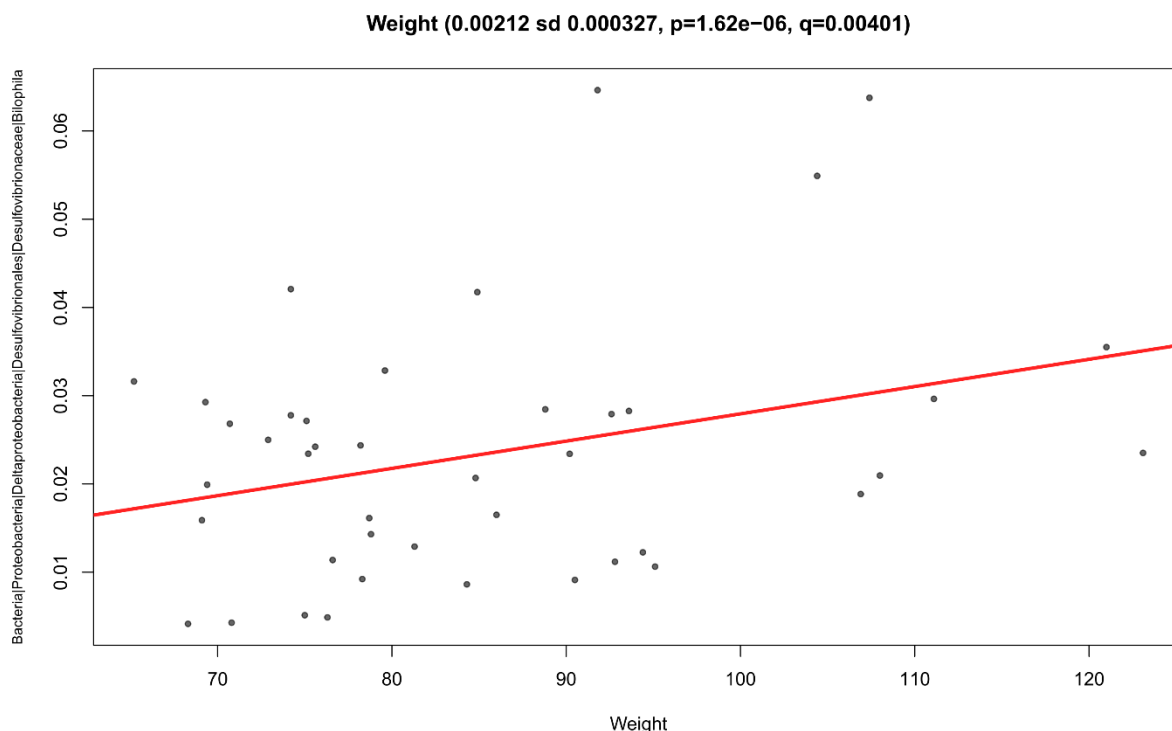

**Figure S5.** Multivariate linear associations of clinical metadata and bacterial relative abundance in all participants. Scatter plot explains the significant association of body weight with *Bilophila* as described in Materials and Methods. y-axes show the relative abundance of gut microbiota; x-axes show the clinical metadata. Numerical data on top of graphic are Coefficient (positive coefficient shows positive association between metadata and gut microbiota), *sd*—standard deviation; *e*—times 10 is raised to the power of; *p*-values, and FDR corrected *q*-values which are assigned by MaAsLin (v0.0.4).

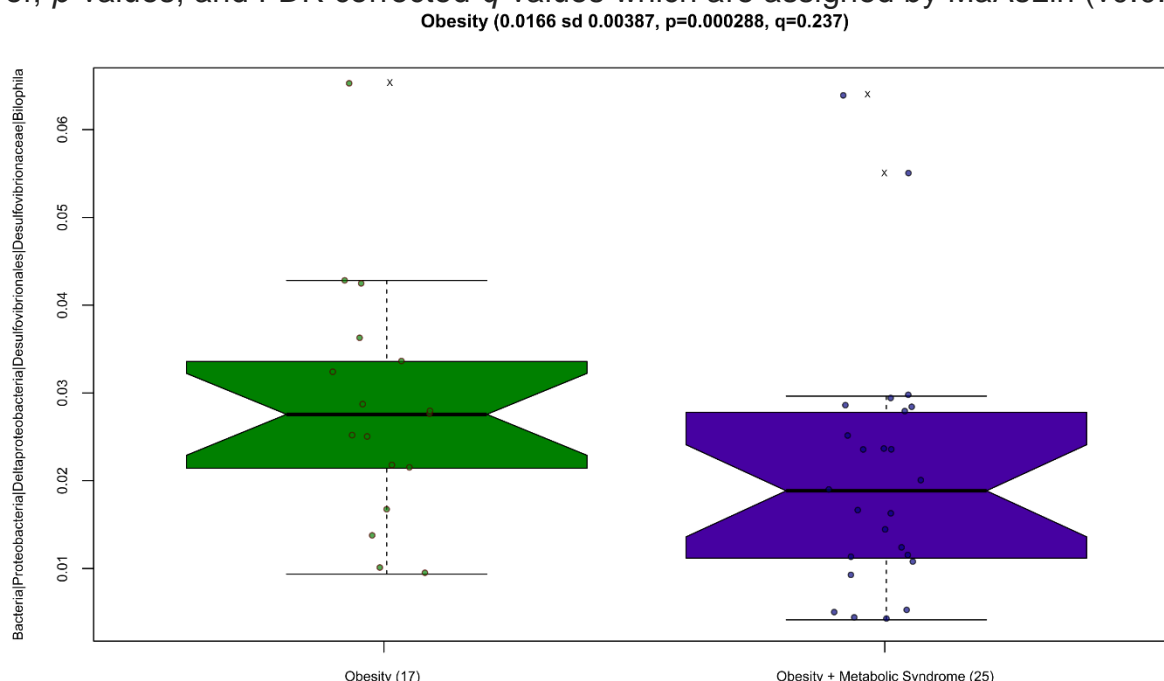

**Figure S6.** Multivariate linear associations of clinical metadata and bacterial relative abundance with OB and OMS. Scatter plot explains the significant association of phenotypic category with *Bilophila* as described in Materials and Methods. y-axes show the relative abundance of gut microbiota; x-axes show the clinical metadata. Numerical data on top of graphic are Coefficient (positive coefficient shows positive association between metadata and gut microbiota), *sd*—standard deviation; *e*—times 10 is raised to the power of; *p*-values, and FDR corrected *q*-values which are assigned by MaAsLin (v0.0.4).
